# Supplementary material
Source: publisher figshare collection journal article supplement (https://acs.figshare.com/ndownloader/files/14187425)
Supplement: Supplementary file 1 [file 14187425]

## Supporting Information

### Achieving highly efficient catalysts for hydrogen evolution reaction by electronic state modification of platinum on versatile $\text{Ti}_3\text{C}_2\text{T}_x$ (MXene)

*Youyou Yuan*<sup>†</sup>, *Haisheng Li*<sup>†</sup>, *Ligang Wang*<sup>†</sup>, *Lei Zhang*<sup>†</sup>, *Dier Shi*<sup>†</sup>, *Yuexian Hong*<sup>†</sup> and *Junliang Sun*<sup>†,\*</sup>

<sup>†</sup> College of Chemistry and Molecular Engineer, Peking University, Beijing National Laboratory for Molecular Sciences(BNLMS), 5 Yiheyuan Road, Beijing, 100871, PR China.

\* Corresponding Author, Email: [junliang.sun@pku.edu.cn](mailto:junliang.sun@pku.edu.cn) (Junliang Sun)

#### Table of contents (9 pages)

|                                                                                                                           |              |
|---------------------------------------------------------------------------------------------------------------------------|--------------|
| <b>Figure S1</b> Morphological characterization of $\text{Ti}_3\text{C}_2\text{T}_x$                                      | <b>S2</b>    |
| <b>Figure S2</b> XRD patterns of TBA- $\text{Ti}_3\text{C}_2\text{T}_x$ treated with different TBAOH solution             | <b>S2</b>    |
| <b>Figure S3</b> TEM characterization of D- $\text{Ti}_3\text{C}_2\text{T}_x$                                             | <b>S2</b>    |
| <b>Figure S4</b> Morphological characterization of TBA- $\text{Ti}_3\text{C}_2\text{T}_x$                                 | <b>S3</b>    |
| <b>Figure S5</b> Morphological characterization of the supports and the catalysts                                         | <b>S3</b>    |
| <b>Figure S6</b> Optimization results of TBA- $\text{Ti}_3\text{C}_2\text{T}_x$ -Pt in the reduction with $\text{NaBH}_4$ | <b>S4</b>    |
| <b>Figure S7</b> XRD patterns of the catalysts obtained by the UV-induced method                                          | <b>S4</b>    |
| <b>Figure S8</b> XPS results of the catalysts                                                                             | <b>S5-S6</b> |
| <b>Figure S9</b> The Nyquist plots of the catalysts                                                                       | <b>S6</b>    |
| <b>Figure S10</b> The cycles of i-t curves for another 60 h                                                               | <b>S7</b>    |
| <b>Figure S11</b> Time optimization results in the synthesis of TBA- $\text{Ti}_3\text{C}_2\text{T}_x$                    | <b>S7</b>    |
| <b>Figure S12</b> The calibration of 3.5 M Ag/AgCl electrode with respect to RHE                                          | <b>S8</b>    |
| <b>Figure S13</b> The LSV curve of TBA- $\text{Ti}_3\text{C}_2\text{T}_x$ -Pt-20 synthesized with short time              | <b>S8</b>    |
| <b>Figure S14.</b> HRTEM of TBA- $\text{Ti}_3\text{C}_2\text{T}_x$ -Pt-20 before and after cycled for 80 h                | <b>S8</b>    |
| <b>Figure S15.</b> Polarization curves of the catalysts in alkaline and neutral solutions                                 | <b>S9</b>    |
| <b>Table S1</b> Contents of Pt in the catalysts determined by ICP-OES                                                     | <b>S9</b>    |

## Supplementary Figures

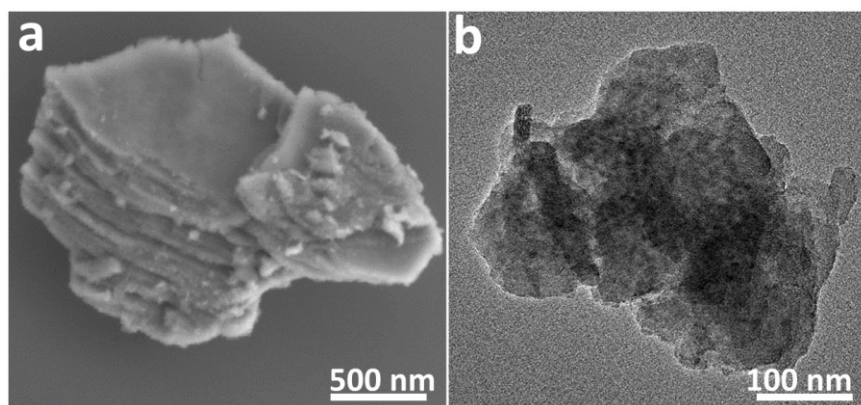

**Figure S1.** Morphological characterization of  $\text{Ti}_3\text{C}_2\text{T}_x$ . (a) the SEM and (b) TEM characterization of  $\text{Ti}_3\text{C}_2\text{T}_x$ .

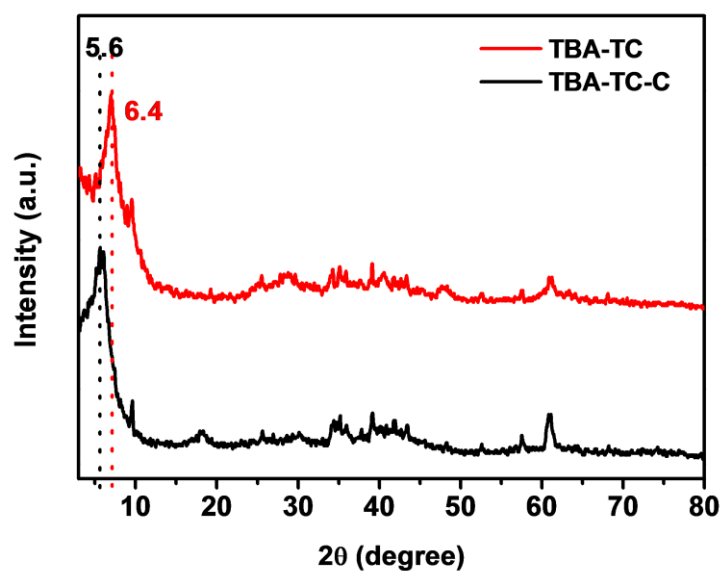

**Figure S2.** XRD patterns of TBA- $\text{Ti}_3\text{C}_2\text{T}_x$  treated with 25 wt% (black) and 2.5 wt% (red) TBAOH solutions.

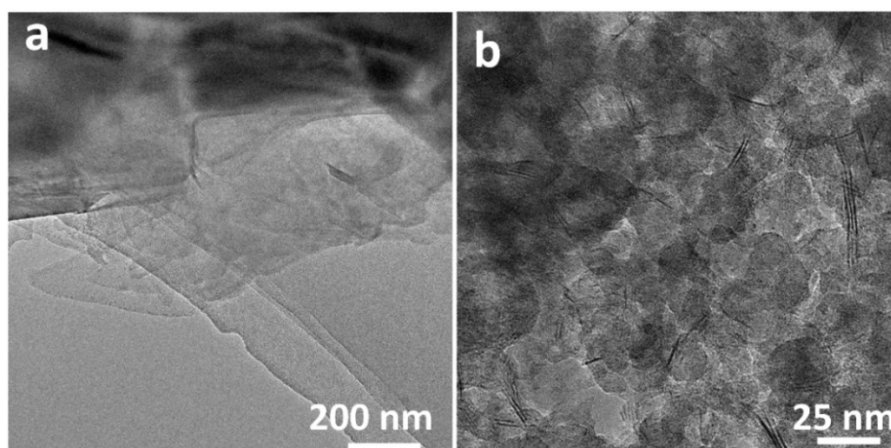

**Figure S3.** TEM characterization of D-Ti<sub>3</sub>C<sub>2</sub>T<sub>x</sub>. (a) TEM image of. (b) HRTEM image of D-Ti<sub>3</sub>C<sub>2</sub>T<sub>x</sub> indicating the layers (2-3 layers).

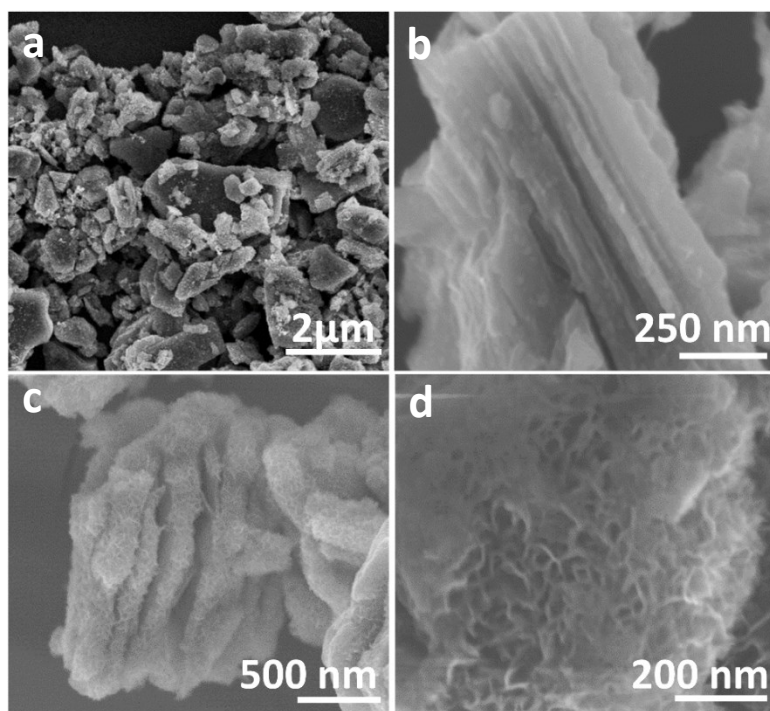

**Figure S4.** Morphological characterization of TBA-Ti<sub>3</sub>C<sub>2</sub>T<sub>x</sub> obtained in different TBAOH concentration. (a) SEM images of TBA-Ti<sub>3</sub>C<sub>2</sub>T<sub>x</sub>-c. (b) The enlarged image of (a). (c) SEM images of TBA-Ti<sub>3</sub>C<sub>2</sub>T<sub>x</sub>. (d) The enlarged image of (c).

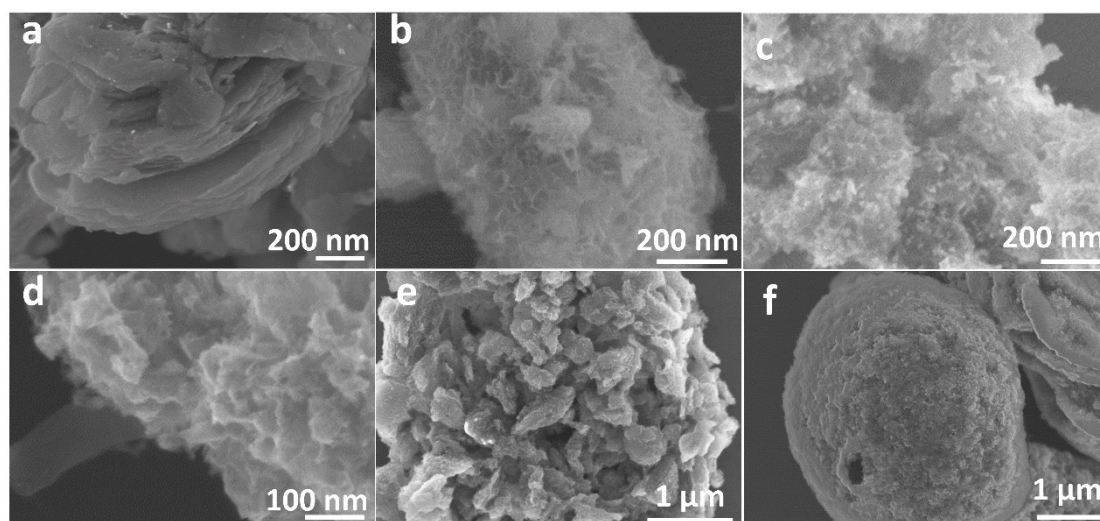

**Figure S5.** Morphological characterization of the supports and the catalysts. (a) SEM images of K-Ti<sub>3</sub>C<sub>2</sub>T<sub>x</sub> (b) SEM image of TBA-Ti<sub>3</sub>C<sub>2</sub>T<sub>x</sub>. (c) The morphology of TBA-Ti<sub>3</sub>C<sub>2</sub>T<sub>x</sub>-Pt with

the reduction of  $\text{NaBH}_4$ . (d) The morphology of  $\text{D-Ti}_3\text{C}_2\text{T}_x\text{-Pt}$  with the reduction of  $\text{NaBH}_4$ . (e) The morphology of  $\text{TBA-Ti}_3\text{C}_2\text{T}_x\text{-Pt}$  with the method of UV-induced reduction. (f) The morphology of  $\text{D-Ti}_3\text{C}_2\text{T}_x\text{-Pt}$  with the method of UV-induced reduction.

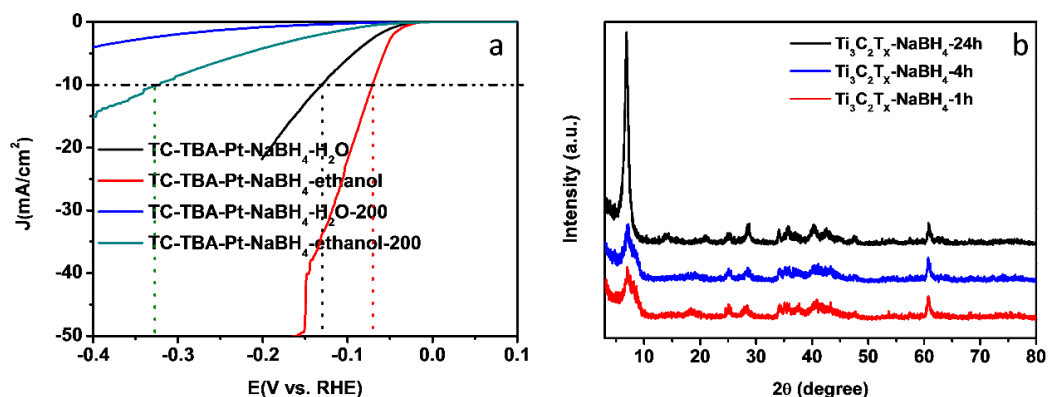

**Figure S6.** Optimization results of the (a) solvent and (b) reaction time in the reduction process by  $\text{NaBH}_4$ . The reduction time and solvent are optimized with a perfect time of 4 h in aqueous solution.

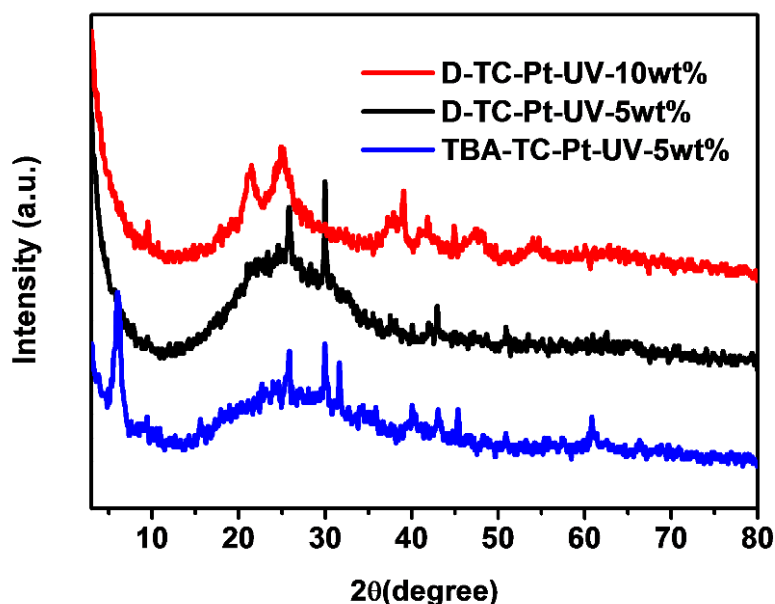

**Figure S7.** XRD patterns of  $\text{TBA-Ti}_3\text{C}_2\text{T}_x\text{-Pt}$  (blue) and  $\text{D-Ti}_3\text{C}_2\text{T}_x\text{-Pt}$  (red and black) obtained by the UV-induced method.

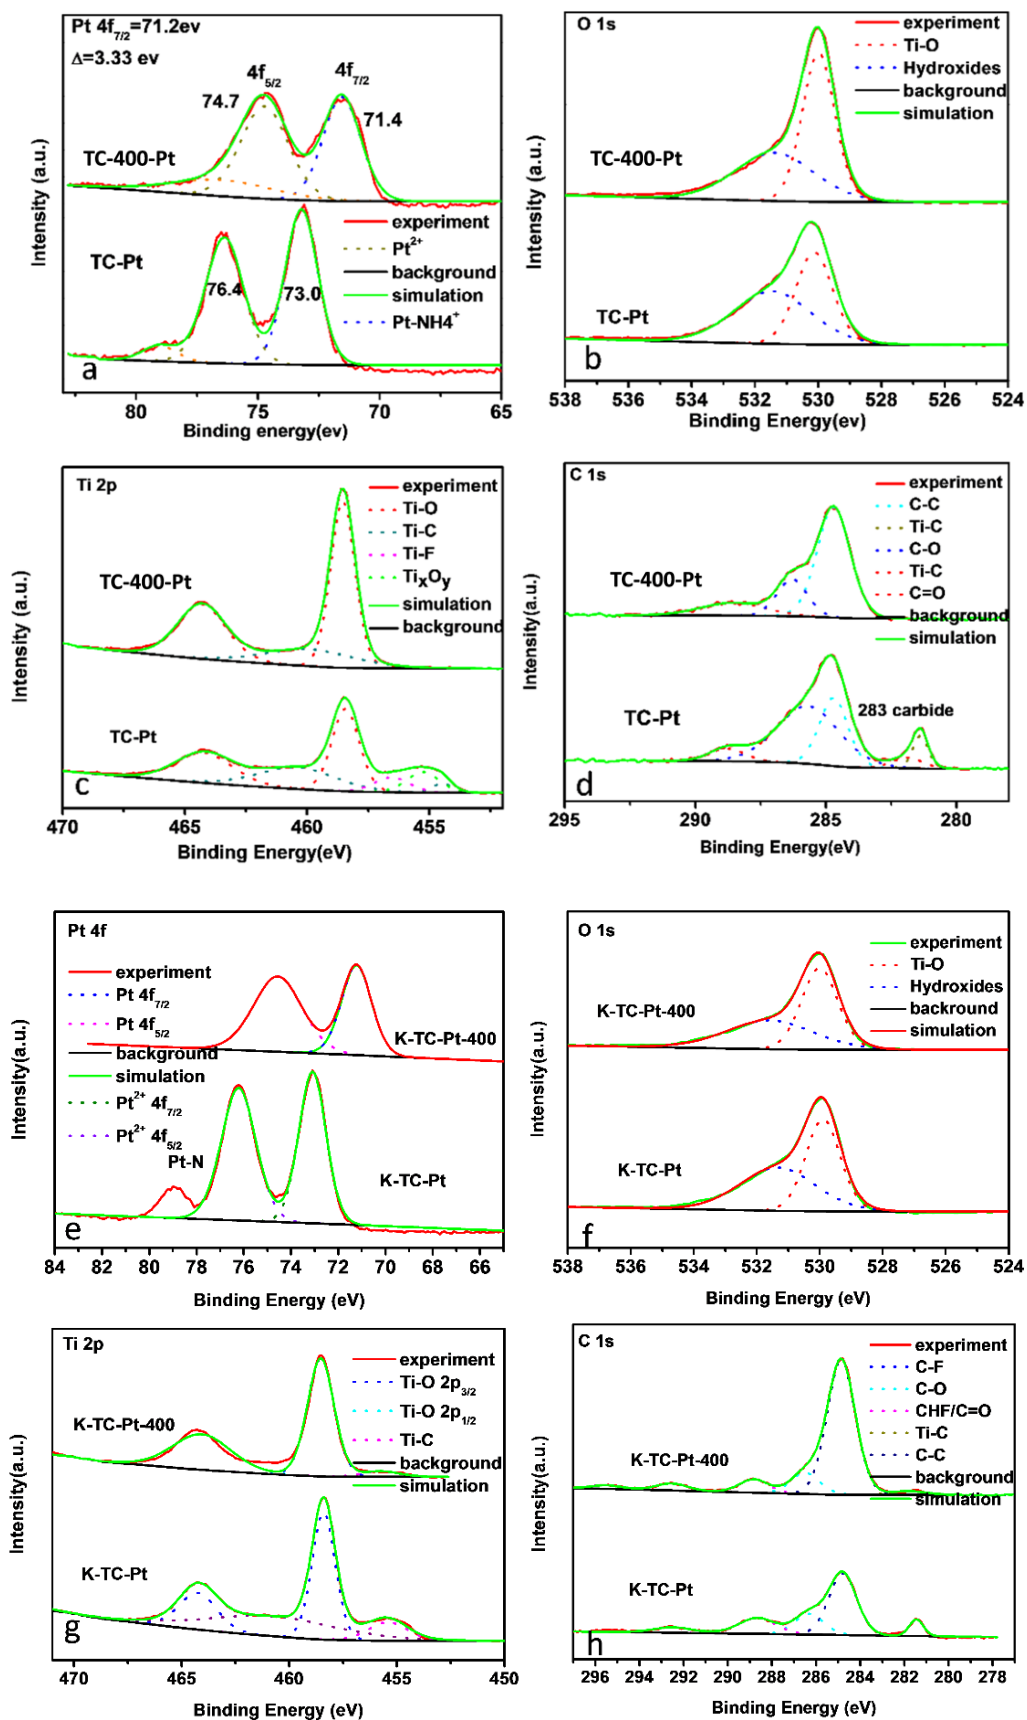

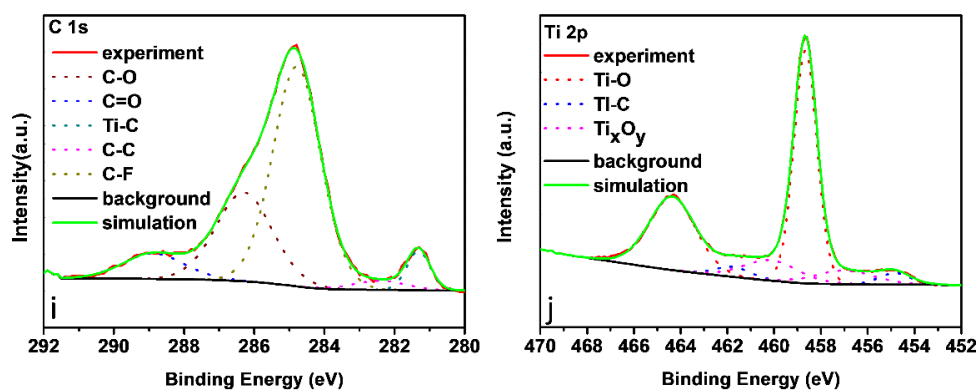

**Figure S8.** XPS results of the catalysts. XPS of the (a) Pt 4f, (b) O 1s, (c) Ti 2p, (d) C 1s spectra of the  $\text{Ti}_3\text{C}_2\text{T}_x\text{-400-Pt-20}$  and  $\text{Ti}_3\text{C}_2\text{T}_x\text{-Pt-20}$ . XPS results of (e) Pt 4f, (f) O 1s, (g) Ti 2p, (h) C 1s of  $\text{K-Ti}_3\text{C}_2\text{T}_x\text{-Pt-20-400}$  and  $\text{K-Ti}_3\text{C}_2\text{T}_x\text{-Pt-20}$ . (I, j) XPS of the C 1s and Ti 2p spectra of  $\text{TBA-Ti}_3\text{C}_2\text{T}_x\text{-Pt-20}$ .

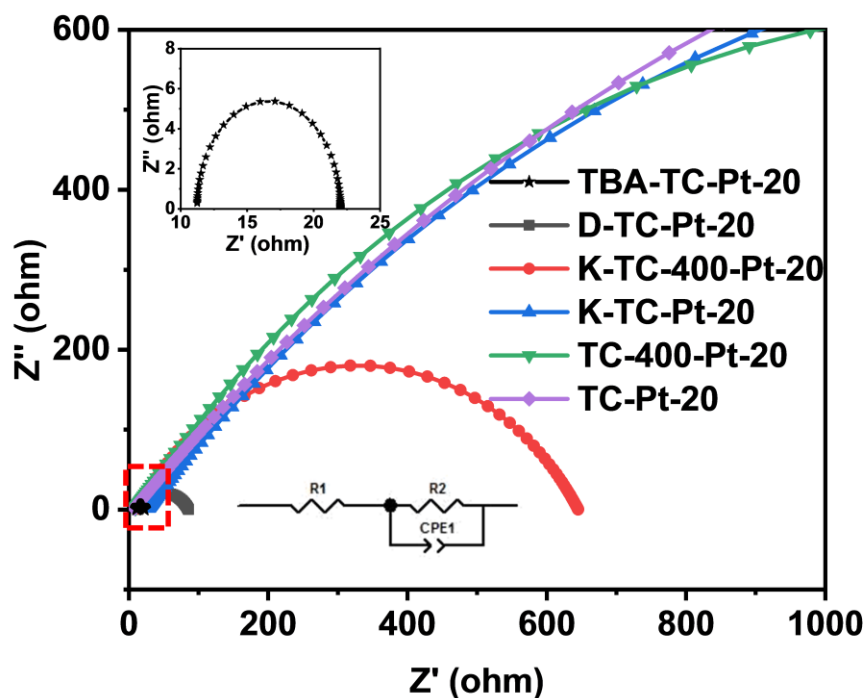

**Figure S9.** The Nyquist plots of the corresponding samples measured at a voltage of -60 mV (vs. the RHE) over the frequency range from 100 kHz to 0.1Hz with the amplitude of 5 mV in 0.5 M  $\text{H}_2\text{SO}_4$ .



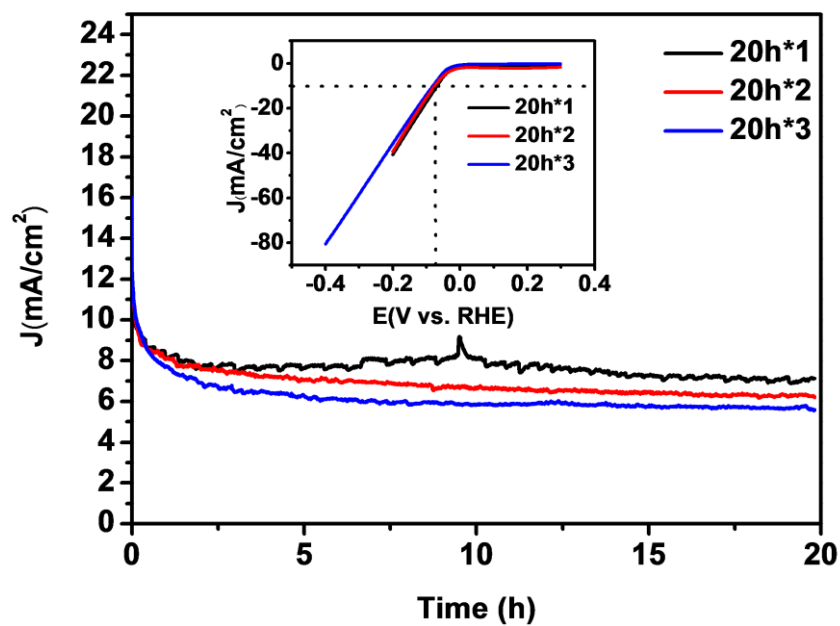

**Figure S10.** The cycles of i-t curves for another 60 h (the total time is 80 h) and the inset is the polarization curves after the corresponding i-t test.

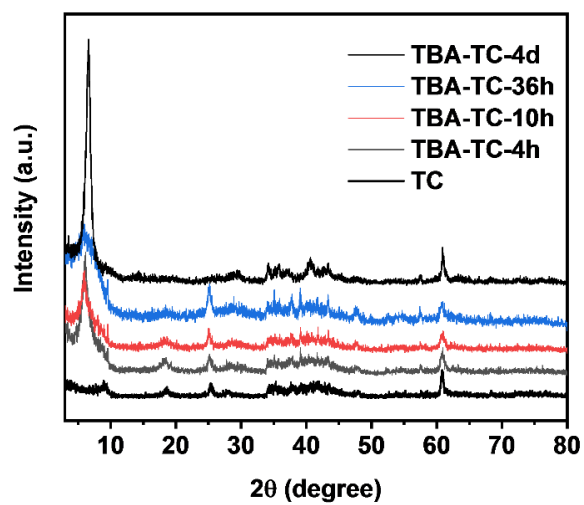

**Figure S11.** Time optimization results in the synthesis of TBA- $\text{Ti}_3\text{C}_2\text{T}_x$

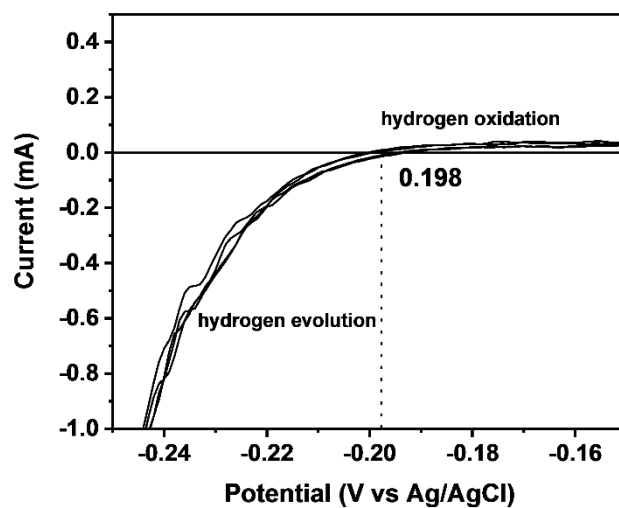

**Figure S12.** The calibration of 3.5 M Ag/AgCl electrode with respect to reversible hydrogen electrode

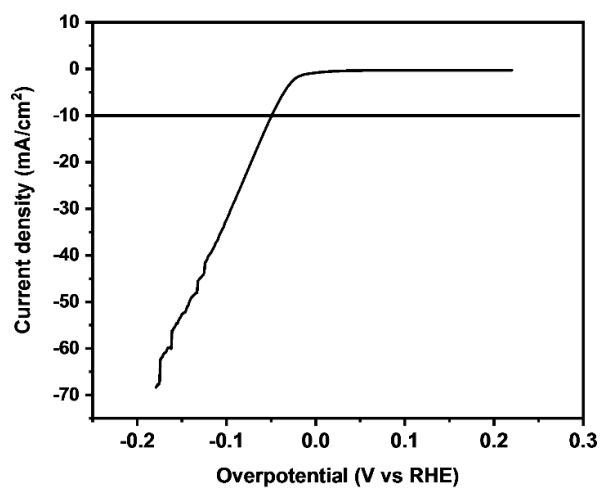

**Figure S13.** The LSV curve of TBA-Ti<sub>3</sub>C<sub>2</sub>T<sub>x</sub>-Pt-20 synthesized with short time (12h)

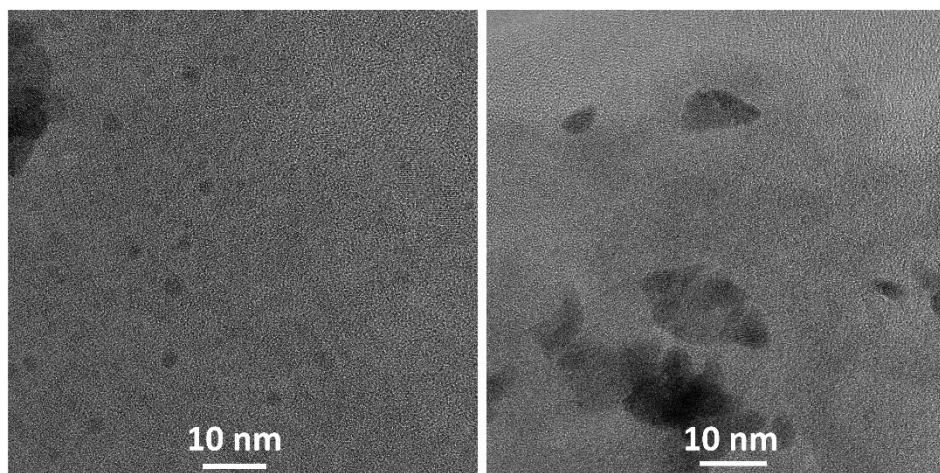

**Figure S14.** HRTEM of TBA-Ti<sub>3</sub>C<sub>2</sub>T<sub>x</sub>-Pt-20 before (left) and after (right) cycled for 80 h



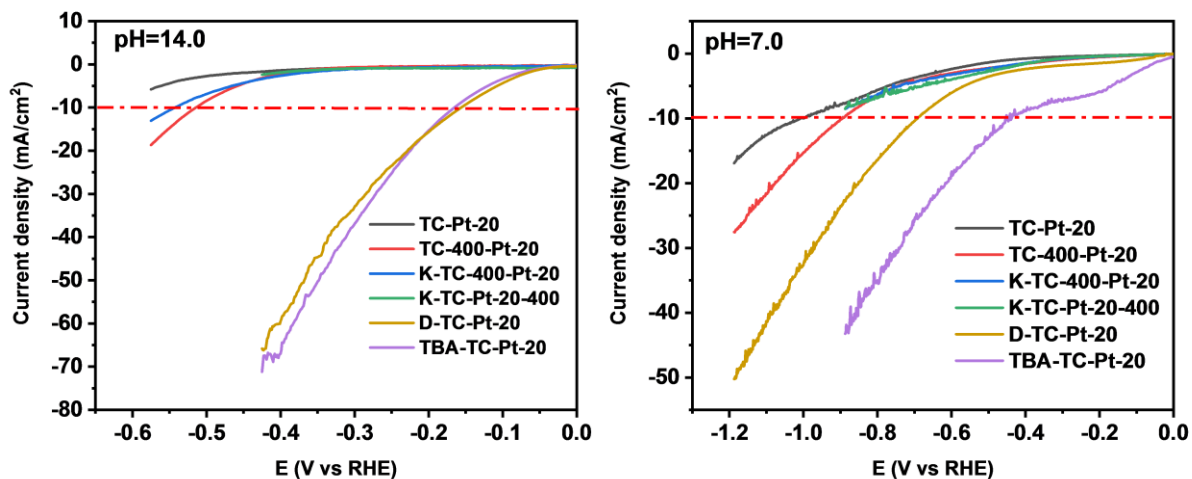

**Figure S15.** Polarization curves of Pt deposited on the supports in 1M KOH (left) and 0.1 M PBS solutions (right).

**Table S1.** Contents of Pt in the catalysts determined by ICP-OES

| Samples        | Pt content (wt%) | Pt NPs size* |
|----------------|------------------|--------------|
| TC-400-Pt-20   | 2.3              | --           |
| K-TC-400-Pt-20 | 0.67             | --           |
| K-TC-Pt-20-400 | 1.15             | --           |
| D-TC-Pt-20     | 0.76             | 6.4 nm       |
| TBA-TC-Pt-20   | 1.2              | 9.4 nm       |
| TBA-TC-Pt-10   | 1.0              | 8.4 nm       |
| TBA-TC-Pt-5    | 0.8              | 7.3 nm       |
| TBA-TC-Pt-2    | 0.4              | --           |
| TBA-TC-Pt-1    | 0.4              | --           |

\* Pt NPs size was calculated by scherrer formula with the XRD data.
